# Supplementary material for: In situ synthesis of carbon fiber-supported SiOx as anode materials for lithium ion batteries
Source: Royal Society of Chemistry journal article supplement (doi:10.1039/c6ra03963d), 2016-01-01
Supplement: c6ra03963d1.pdf [file c6ra03963d1.pdf]

## ***Supporting information***

### **In-situ synthesis of carbon fiber-supported SiO<sub>x</sub> as anode materials for lithium ion batteries**

Xuejun Bai<sup>b</sup>, Biao Wang<sup>a,b\*</sup>, Huaping Wang<sup>a,b</sup>, Jianming Jiang<sup>b</sup>

<sup>a</sup> State Key Laboratory for Modification of Chemical Fibers and Polymer Materials, Donghua

University, Shanghai 201620, P. R. China.

<sup>b</sup> College of Material Science and Engineering, Donghua University, Shanghai 201620, P. R. China.

Tel.: +86 21 67792731; fax: +86 21 67792855.

E-mail address: wbiao2000@dhu.edu.cn

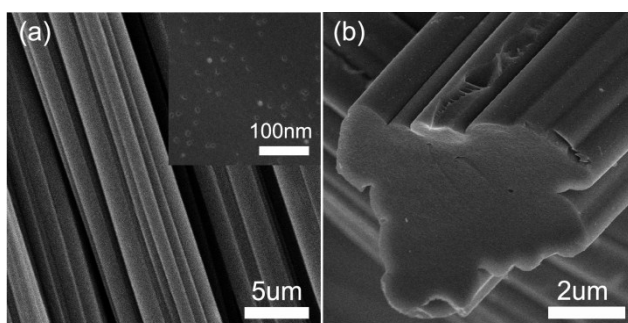

**Fig. S1** FESEM images of CF (a) top surface image, and (b) cross-section images.

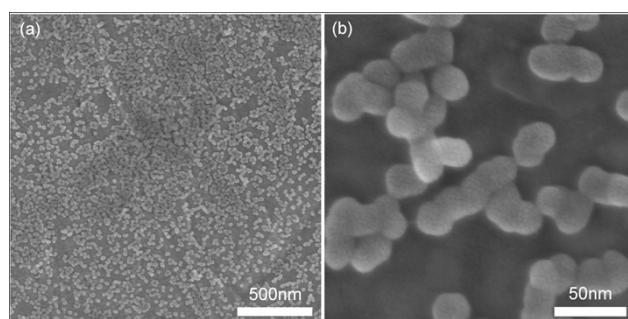

**Fig. S2** FESEM images of SiO<sub>x</sub> particles.

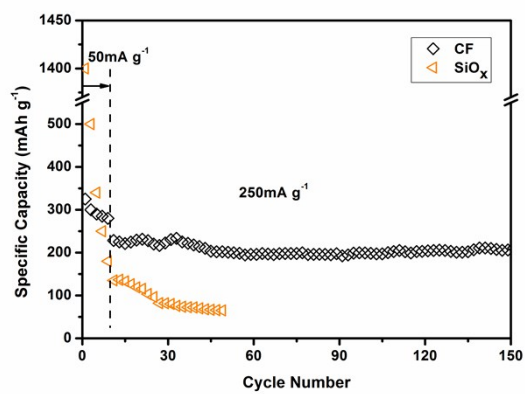

**Fig.S3** Cycling performances of CF and SiO<sub>x</sub> at 250 mA g<sup>-1</sup> between 0.01 and 2.0 V.

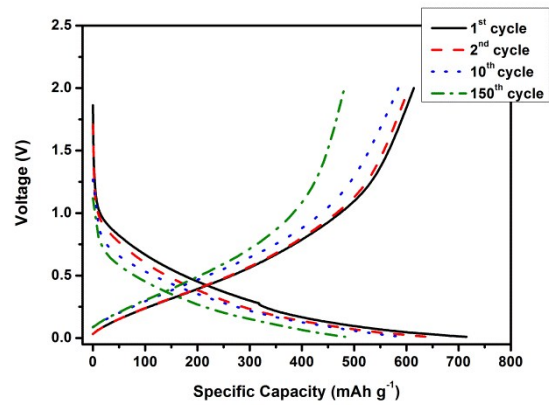

**Fig.S4** Galvanostatic voltage profiles of CF-SiO<sub>x</sub>-3 at 250 mA g<sup>-1</sup> between 0.01 and 2.0 V.
